# Supplementary material for: Immunosuppressive glycoproteins associate with breast tumor fibrosis and aggression
Source: PubMed Central journal article supplement — Matrix Biol Plus. 2022 Mar 9;14:100105. doi: 10.1016/j.mbplus.2022.100105 (PMC8981759; doi:10.1016/j.mbplus.2022.100105), 2022-03-09
Supplement: mmc1.pdf [file mmc1.pdf]

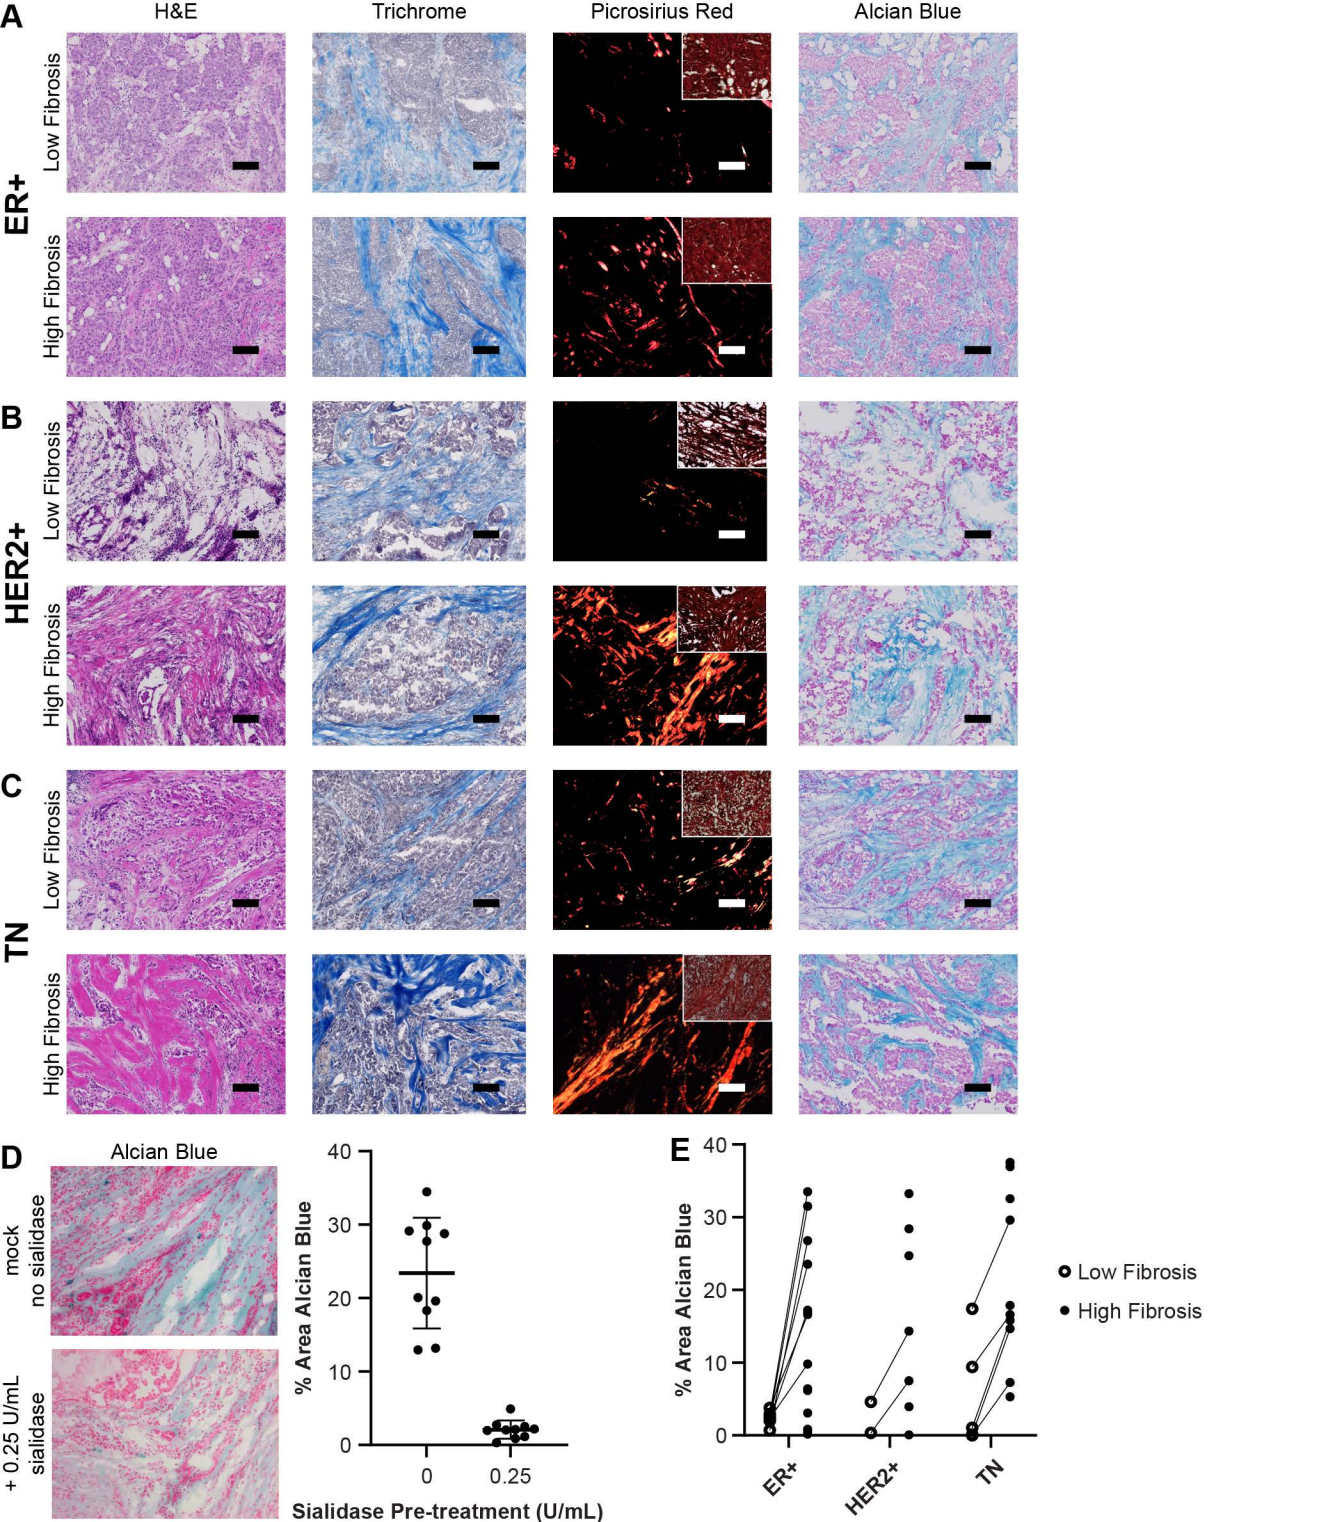

**Figure S1.** Acidic glycoprotein content is elevated in high fibrosis regions and associates with aggression in breast tumors. **A-C.** Representative images of staining of all breast cancer subtypes. Scale bar represents 100  $\mu$ m. **D.** Representative images of Alcian blue staining with or without sialidase pretreatment. In the adjacent plot, each point represents one field of view from a HER2+ tumor. The mean is plotted and the error bars represent one standard deviation. **E.** Plots of % area Alcian blue in low and high fibrosis regions by breast cancer subtype.

**A**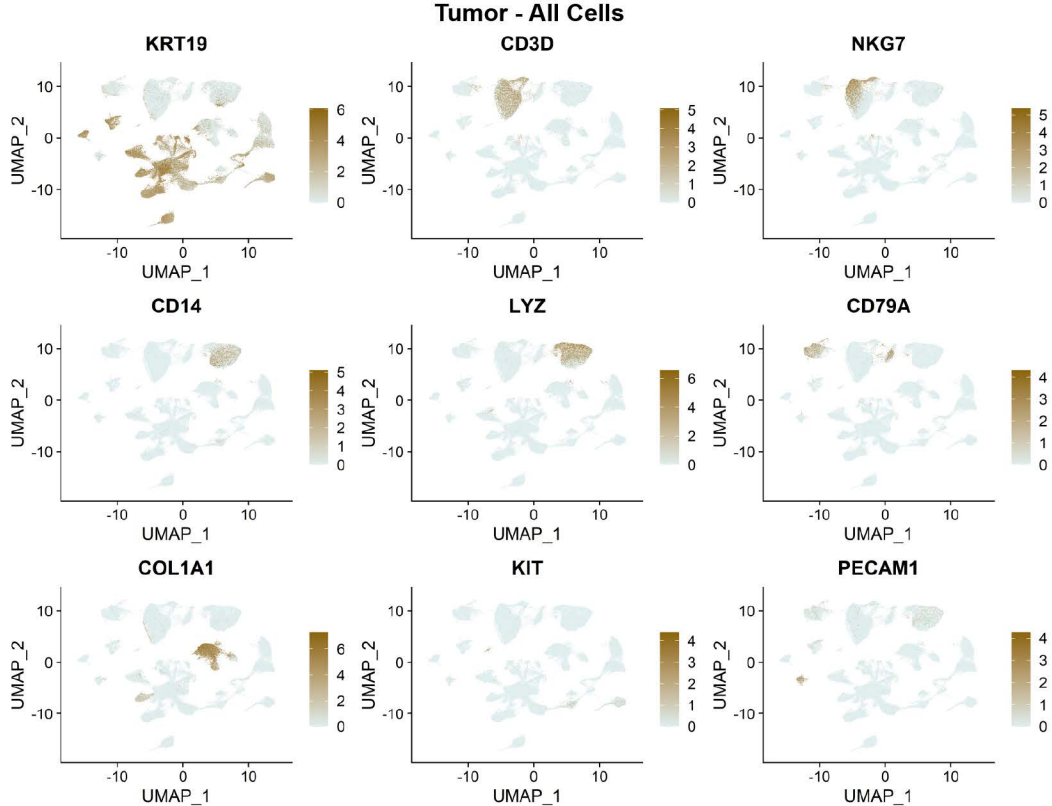**B**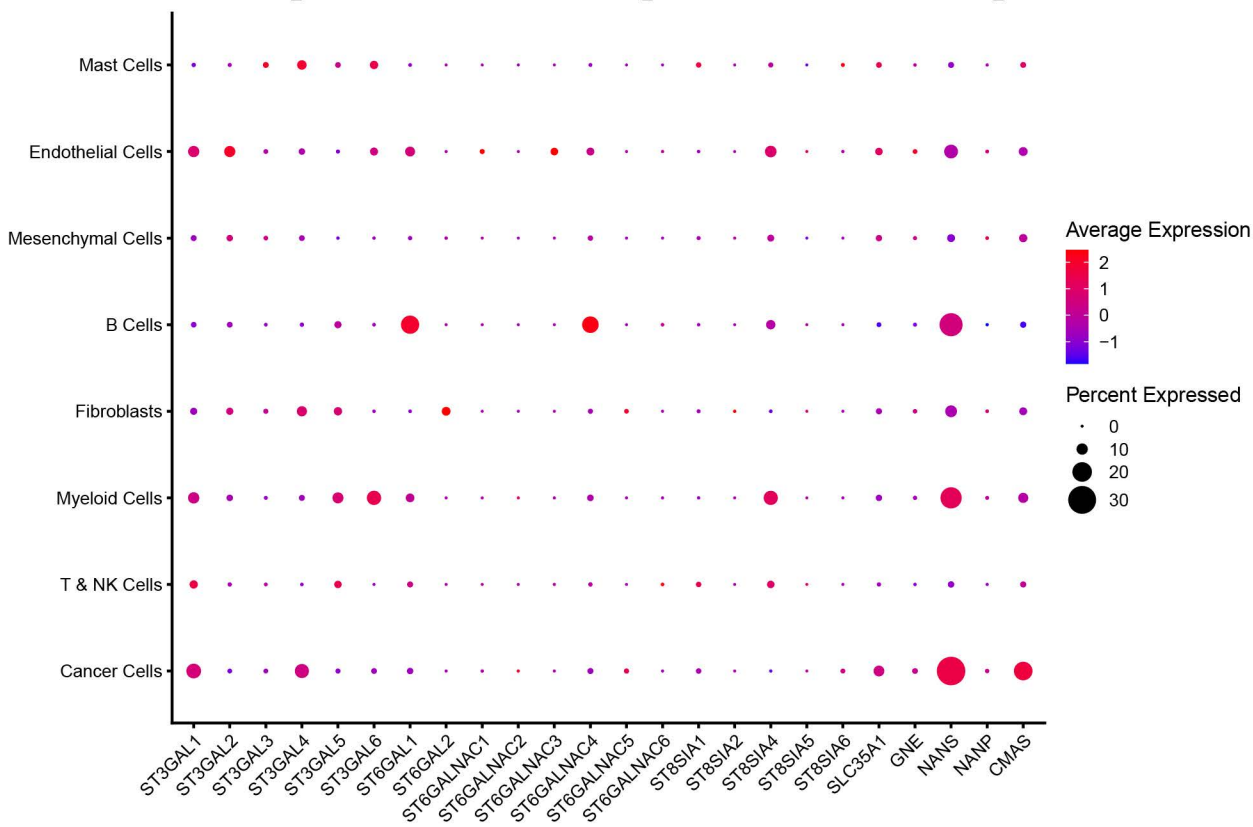

**Figure S2.** Analysis of scRNAseq of 34 tumor samples from Pal et al., EMBO 2021. **A.** Feature plots for cluster assignments. **B.** Dot plot of sialic acid biosynthetic gene expression for each cell type.

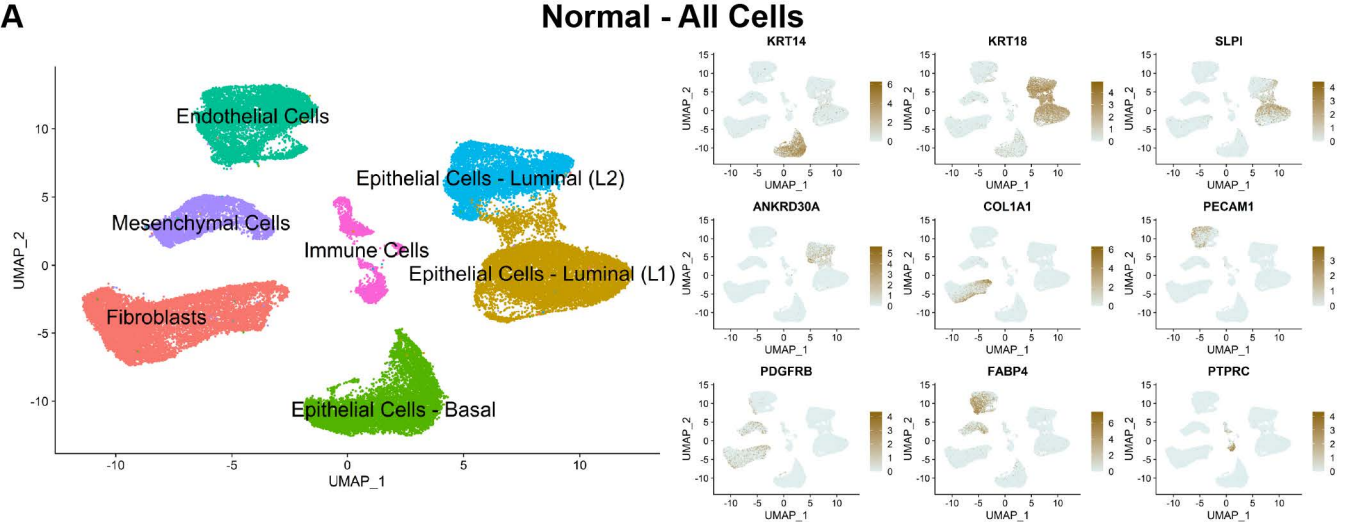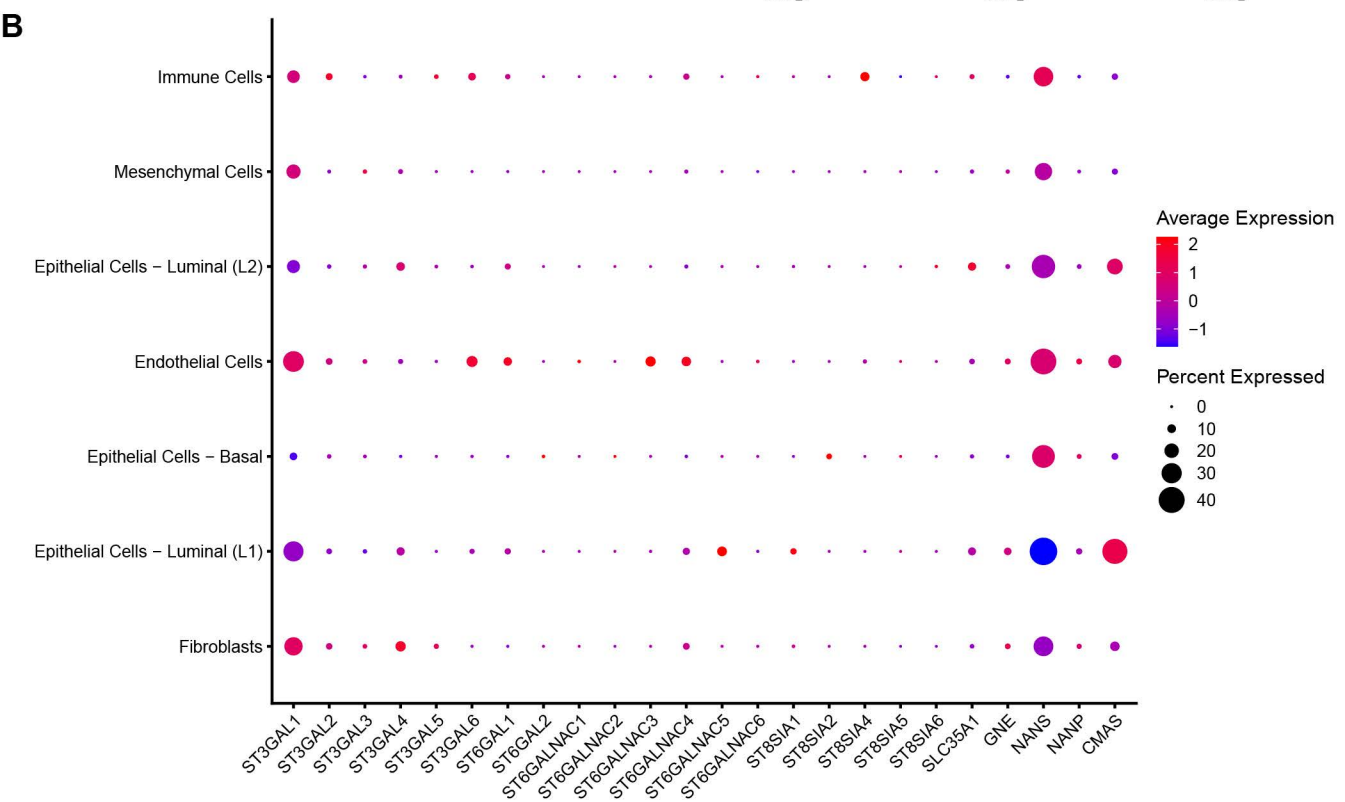

**Figure S3.** Clustering of normal breast samples from Pal et al., EMBO 2021.

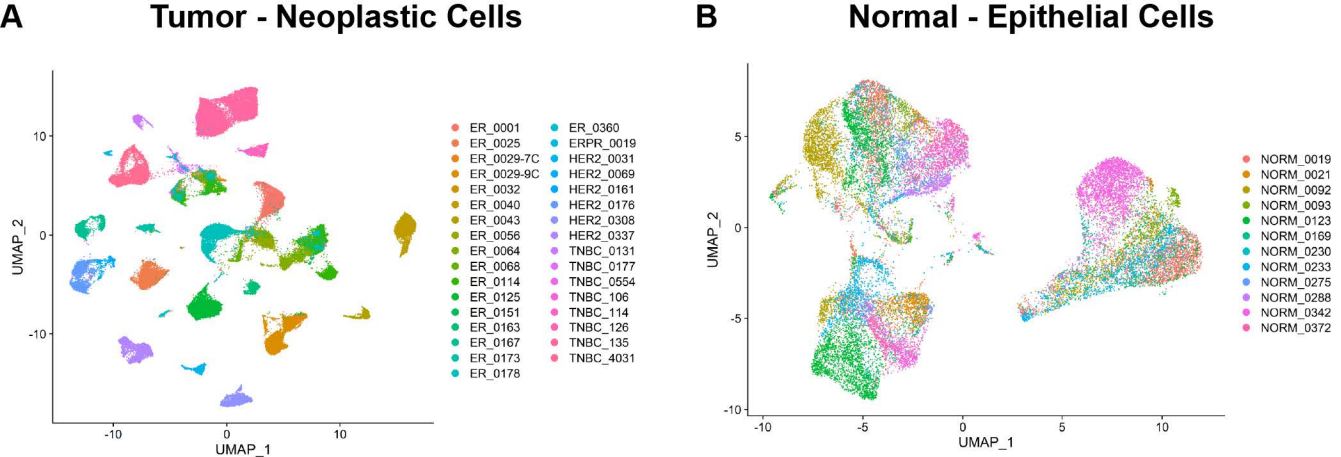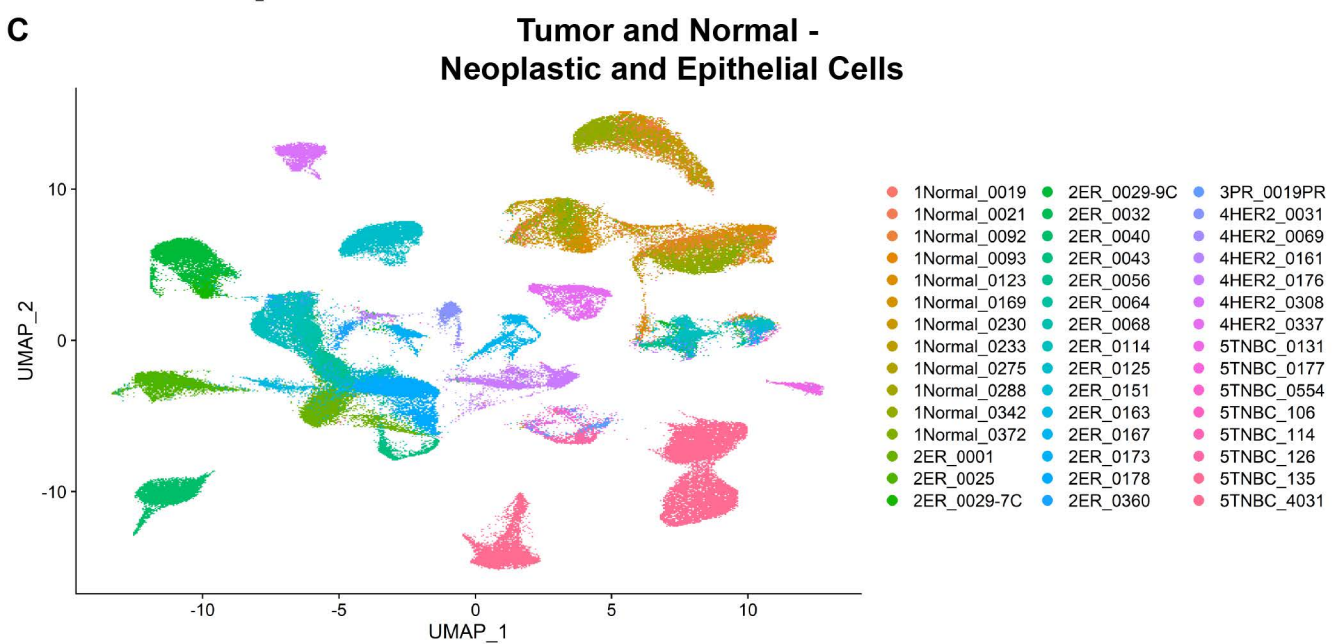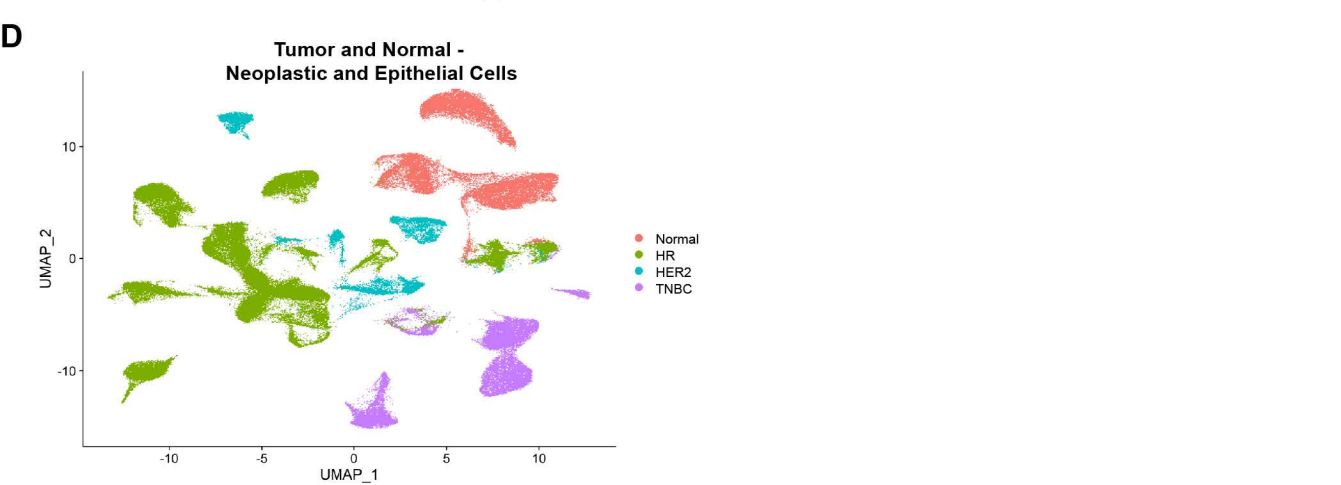

**Figure S4.** Analysis of extracted epithelial cells from tumor and normal breast. **A.** UMAP plot of cancer cells colored by patient. **B.** UMAP plot of epithelial cells colored by patient. **C-D.** UMAP plot of epithelial cells from tumors and normal breast colored by **C.** patient and **D.** subtype.

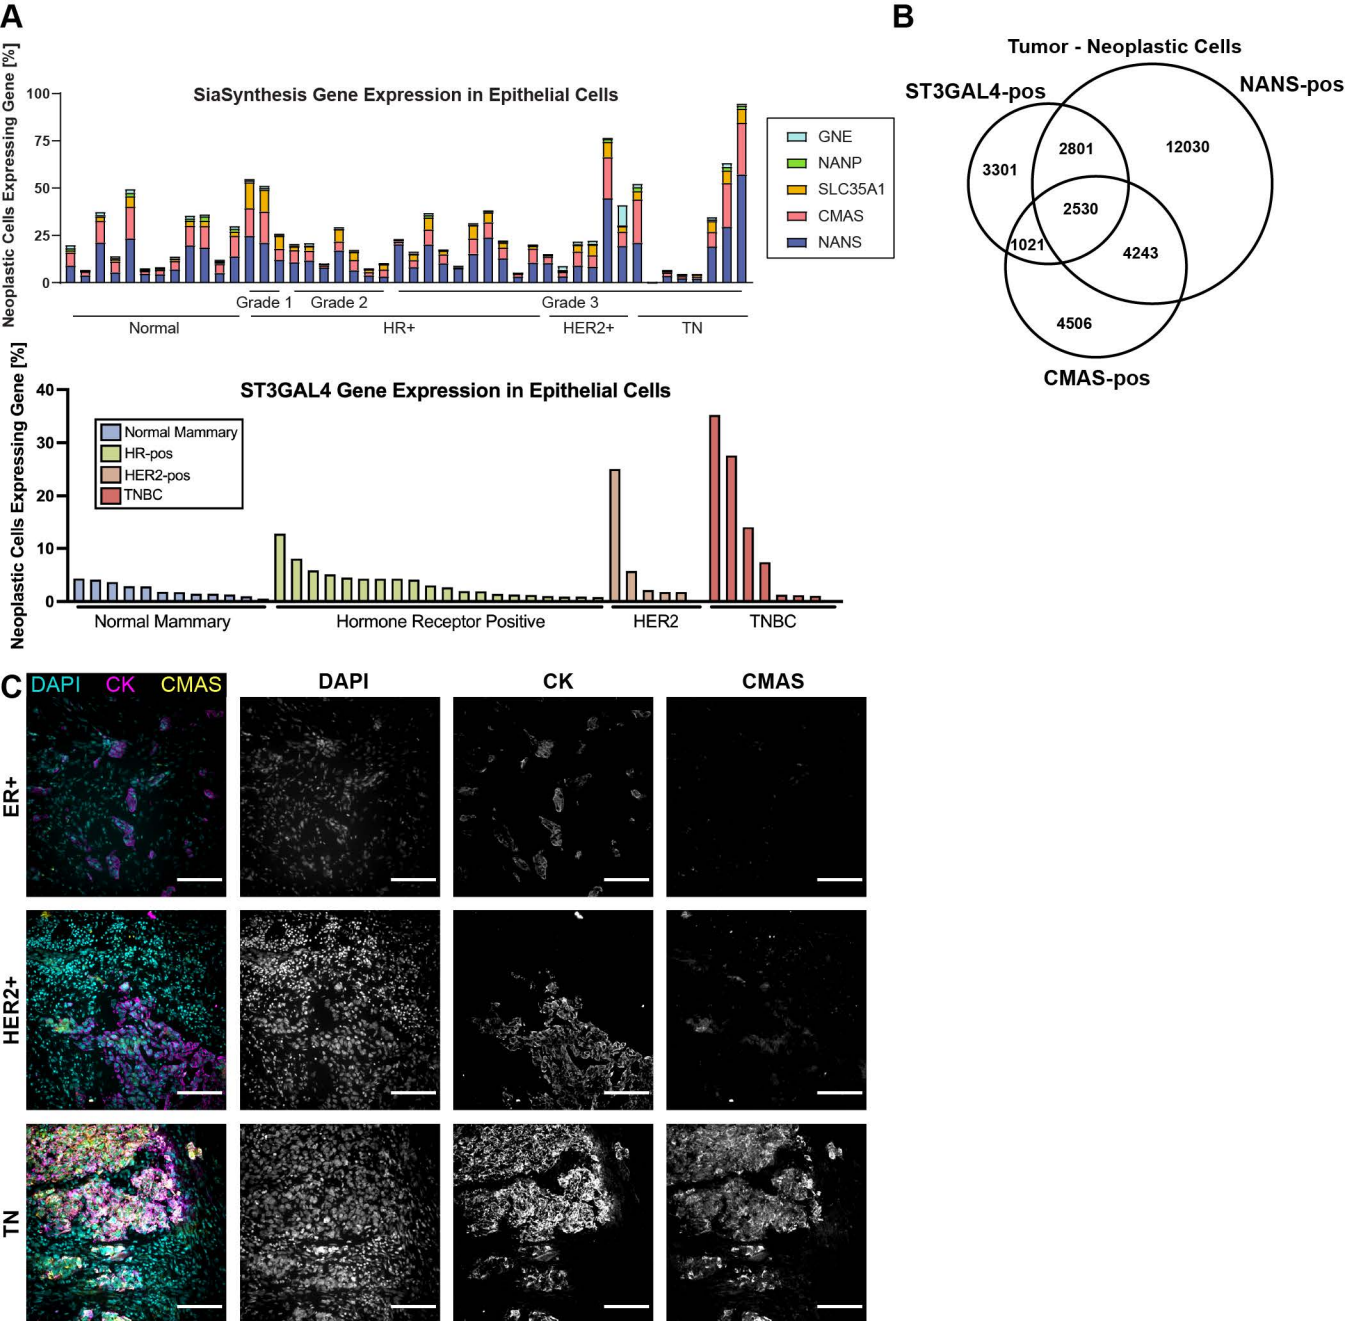

**Figure S5.** Analysis of sialoglycoprotein biosynthetic gene expression. **A.** Bar plot of (*top*) sialic acid biosynthetic genes and (*bottom*) *ST3GAL4* expression in epithelial cells from breast tumors and normal breast from scRNAseq dataset from Pal, et al., EMBO, 2021. **B.** Venn diagram of individual cell expression of *ST3GAL4*, *NANS*, and *CMAS* from breast tumor scRNAseq data. **C.** Representative images of breast tumors stained with DAPI, anti-pan-cytokeratin (CK), and anti-CMAS.

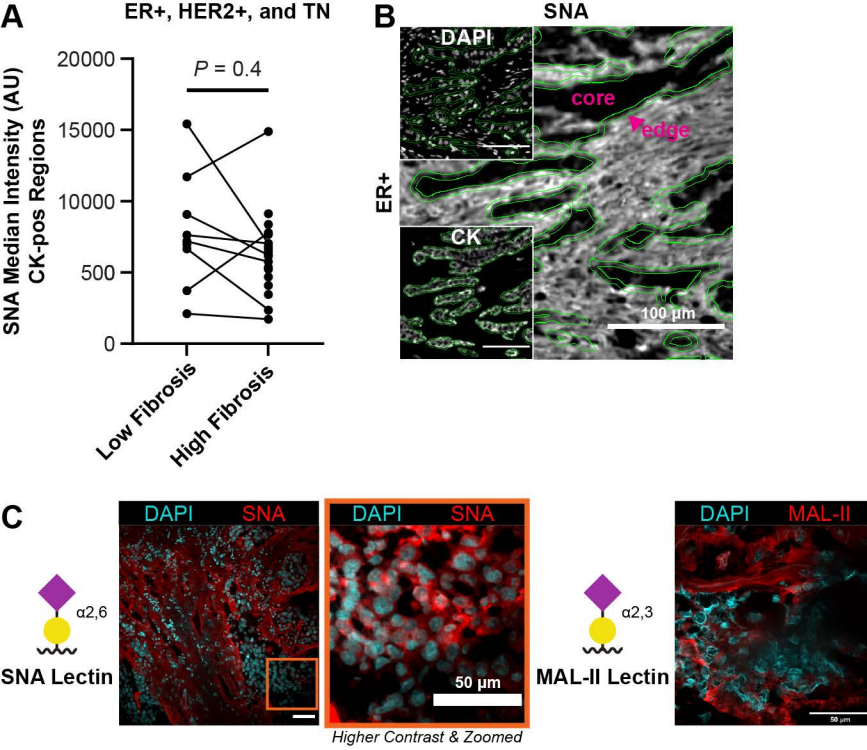

**Figure S6.** Analysis of lectin staining in breast tumors. **A.** Plot of SNA lectin median intensity staining in anti-pan-cytokeratin-positive regions (CK-pos) by local fibrosis. **B.** Representative IF images used for quantification of SNA lectin staining of cancer cell region edge and core. Cancer cell regions were identified as CK-pos regions. **C.** Representative IF images of SNA lectin and MAL-II lectin.

**A Tumor - All Cells**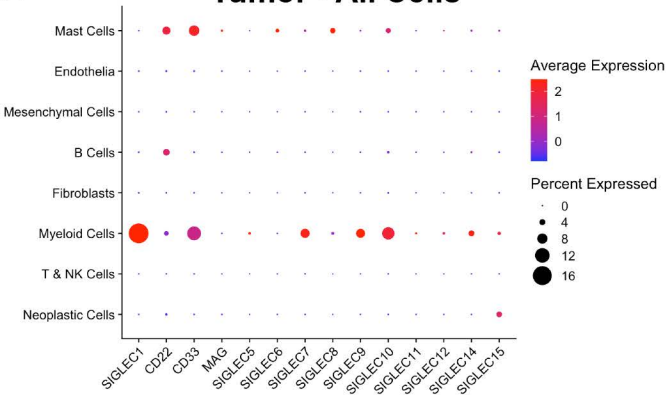**B Tumor - Immune Cells**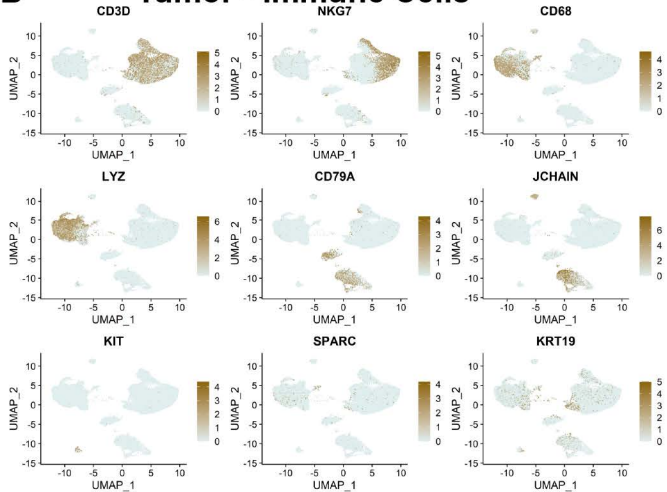**C**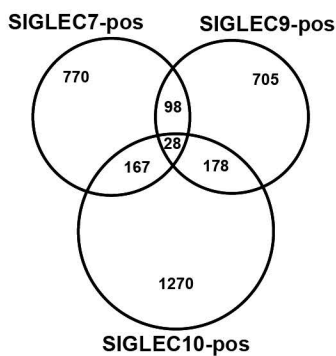

**Figure S7.** Analysis of *SIGLEC* expression in breast tumors from scRNAseq dataset from Pal et al., EMBO 2021. **A.** Dot plot for all 14 human *SIGLECs*. **B.** Feature plots for cluster assignments. **C.** Venn diagram of individual cell expression of *SIGLEC7*, *SIGLEC9*, and *SIGLEC10*.

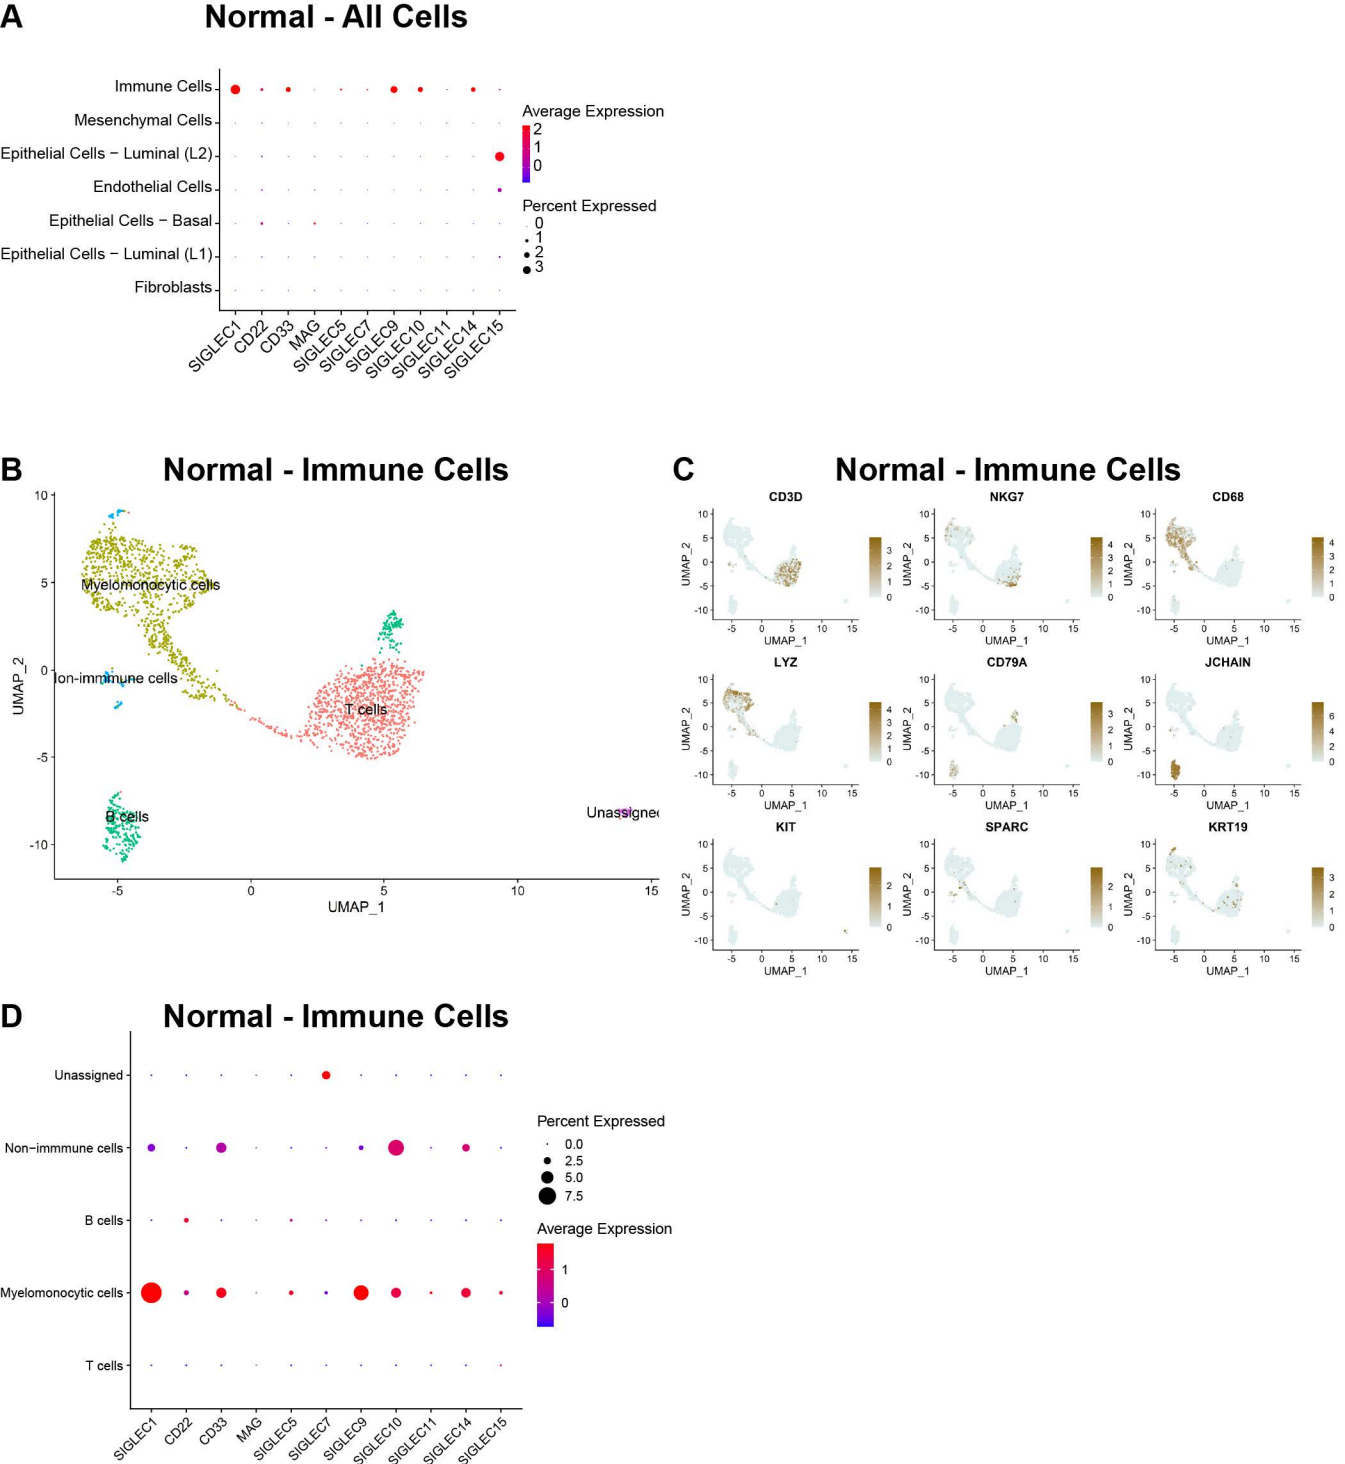

**Figure S8.** Analysis of *SIGLEC* expression in normal breast tissues from scRNAseq dataset from Pal et al., EMBO 2021. **A.** Dot plot for all 14 human *SIGLECs* in all cell types. **B.** UMAP plot of extracted immune cells. **C.** Feature plots for cluster assignments. **D.** Dot plot for all 14 human *SIGLECs* in immune cell types.



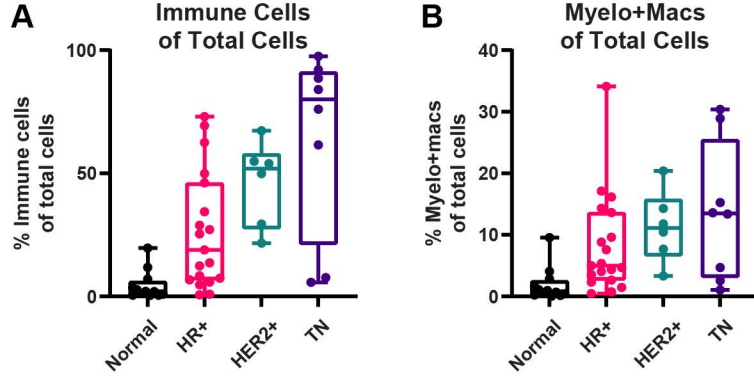

**Figure S9.** Analysis of inflammation in breast tumors and normal breast tissue from scRNAseq dataset from Pal, et al., EMBO, 2021. **A.** Quantification of percent immune cells of total cells by subtype. **B.** Quantification of percent myelomonocytic cells and macrophages of total cells by subtype.

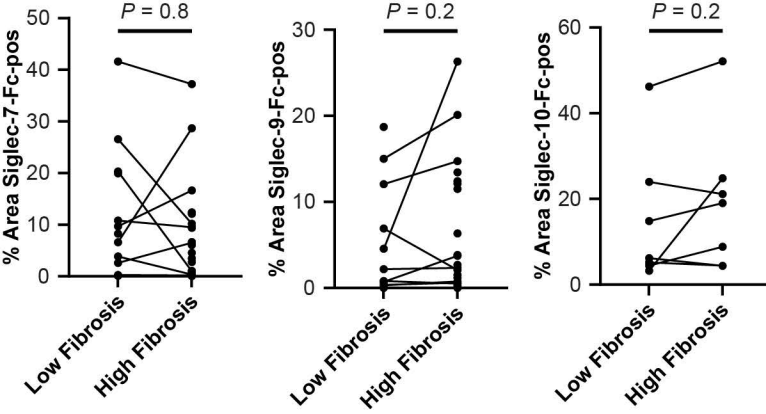

**Figure S10.** Quantification of Siglec ligand staining percent area in low and high fibrosis regions.
